# Supplementary material for: Association of eating habits and cooking methods with breast tumors among childbearing aged urban women in Indonesia: A cross-sectional study
Source: Research Square preprint supplement (doi:10.21203/rs.3.rs-107967/v1), 2020-11-25
Supplement: Supplementary file 1 [file 66124e00c12a0471fc93ddad.docx]

**Association of eating habits and cooking methods with breast tumors among childbearing aged urban women in Indonesia: A cross-sectional study**

Imaviana Cahyani 1†, Adi Lukas Kurniawan 2,†*,Khairizka Citra Palupi 1, Amadou Wurry Jallow 3, Rathi Paramastri 4, Mertien Sa’pang 1

**Supplementary Table 1.** Food groups and food items list

| **Food groups** | **Food items** |
| --- | --- |
| Meats | Chicken, chicken skin, duck, beef, pork, lamb, and buffalo meat |
| Eggs | Chicken egg, duck egg, egg yolk |
| Innards organs | Chicken liver, brain, chicken blood, cow liver, cow intestine |
| Processed meats | Corned beef, meat ball, sausage, cow tripe |
| Seafood | Shrimp, fish, salted fish, dried fish |
| Milk and dairy products | Liquid skim milk, powder skim milk, yogurt, cheese, lamb milk, cow milk, sweetened condensed milk, buffalo milk, full cream milk |
| Fast food | Fried chicken, burger/hotdog, pizza, French fries |
| Beans or legumes | Green bean, soy bean, red bean, peanut, black-eyed pea, oncom, tofu, tempeh, soy milk |
| Light vegetables | Green bean, luffa acutangula, baby corn, cabbage, cucumber, cauliflower, yardlong bean, winged bean, chayote, white radish, young jackfruit, bitter melon, young papaya, bamboo shoot, mung bean sprout, eggplant, tomato, carrot |
| Dark-leafy vegetables | Spinach, broccoli, choy sum, limnocharis flava, water spinach, Gnetum gnemon leaves, bok choy |
| Fruits | Avocado, grapes, red apple, green apple, star fruit, cantaloupe, langsat, durian, watery rose apple, guava, orange, ambarella, Japanese persimmon, lychee, mango, mangosteen, passion fruit, melon, jackfruit, pineapple, pear, papaya, banana, rambutan, sapodilla, salak, watermelon, soursop, sugar apple, strawberry |
| Oils | Coconut, margarine, butter, coconut oil, palms oil, coconut milk |
